# Supplementary material for: The ternary amide KLi3(NH2)4: an important intermediate in the potassium compound-added Li–N–H systems
Source: Royal Society of Chemistry journal article supplement (doi:10.1039/c4ra00077c), 2014-01-01
Supplement: c4ra00077c1.pdf [file c4ra00077c1.pdf]

(Supplementary information)

**The ternary amide  $\text{KLi}_3(\text{NH}_2)_4$ : an important intermediate in the  
potassium compounds-added Li–N–H systems**

**Bao-Xia Dong, Liang Song, Jun Ge, Yun-Lei Teng\*, Shi-Yang Zhang**

*College of Chemistry and Chemical Engineering, Yangzhou University, Yangzhou,*

*225002, P. R. China.*

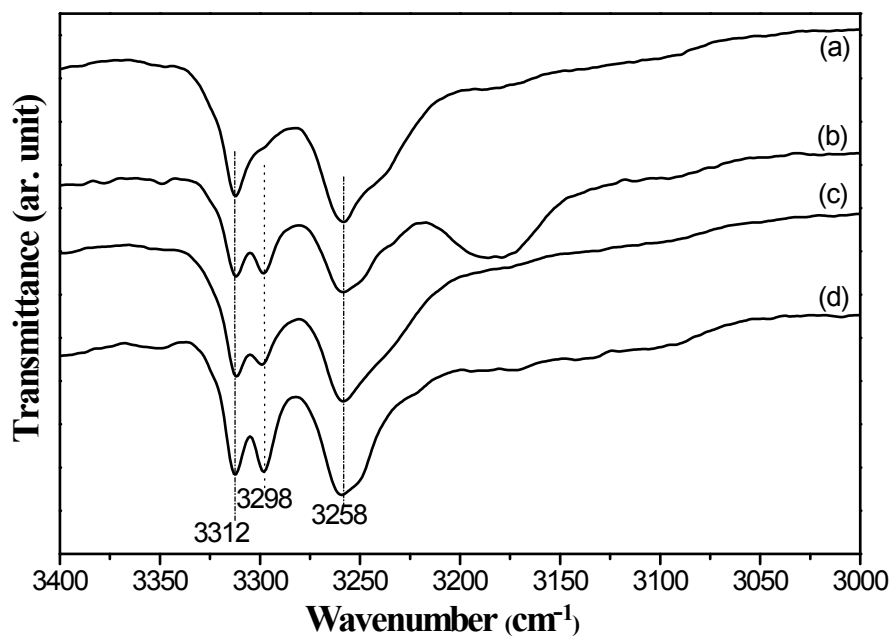

**Fig. S1** FTIR of  $\text{KH/LiNH}_2$  with molar ratio of 1/4 after ball milling (a) and treatment under Ar atmosphere at 200 °C for 48 hours (b);  $\text{KNH}_2/\text{LiNH}_2$  with molar ratio of 1/3 after ball milling (c) and treatment under Ar atmosphere at 200 °C for 48 hours (d).

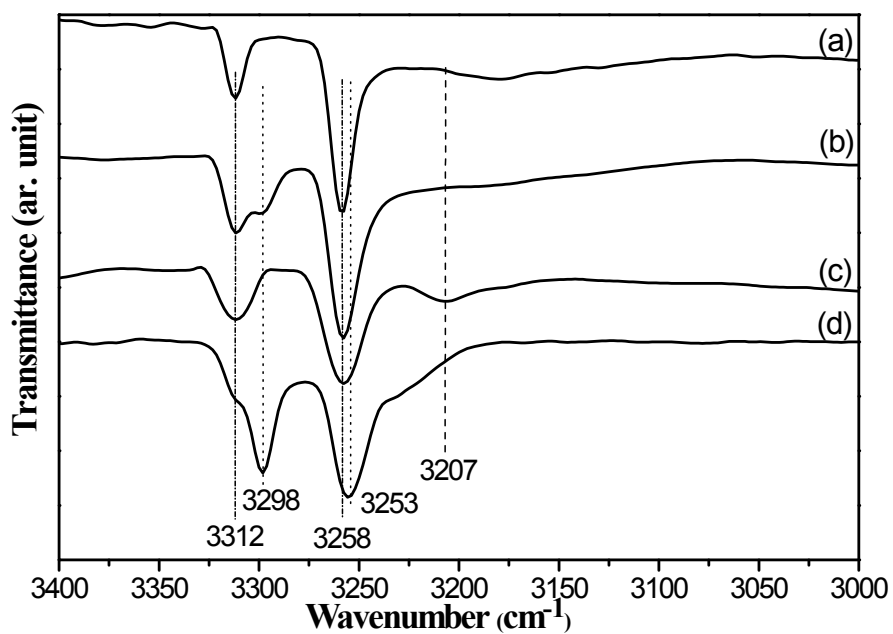

**Fig. S2** FTIR of KH/LiNH<sub>2</sub> with molar ratio of 1/4 after hand milling (a) and treatment under Ar atmosphere at 200 °C for 48 hours (b); KNH<sub>2</sub>/LiNH<sub>2</sub> with molar ratio of 1/3 after hand milling (c) and treatment under Ar atmosphere at 200 °C for 48 hours (d).

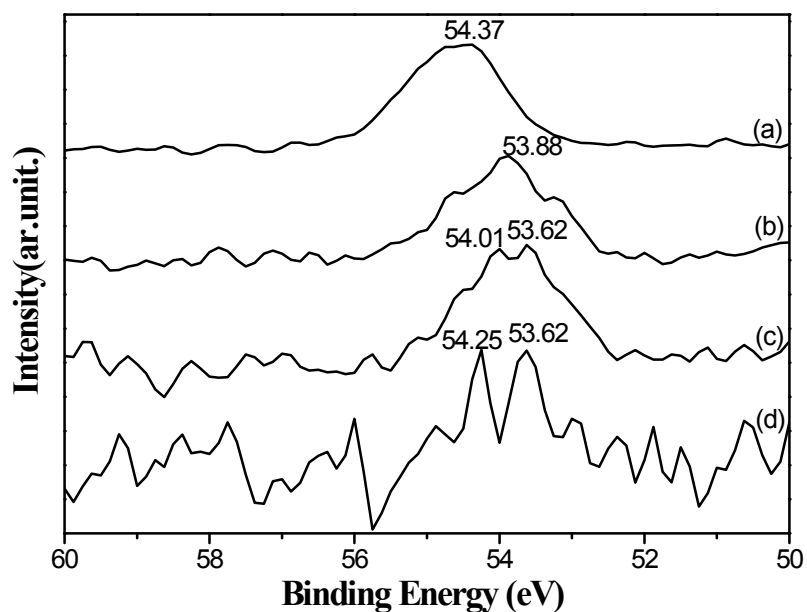

**Fig. S3** XPS Li(1s) spectra of the raw LiNH<sub>2</sub> (a), the just synthesized KLi<sub>3</sub>(NH<sub>2</sub>)<sub>4</sub> single phase by ball milling (b), KH/LiNH<sub>2</sub> with molar ratio of 1/4 after hand milling and treatment under Ar atmosphere at 200 °C for 48 hours (c), KNH<sub>2</sub>/LiNH<sub>2</sub> with molar ratio of 1/3 after hand milling and treatment under Ar atmosphere at 200 °C for 48 hours (d).

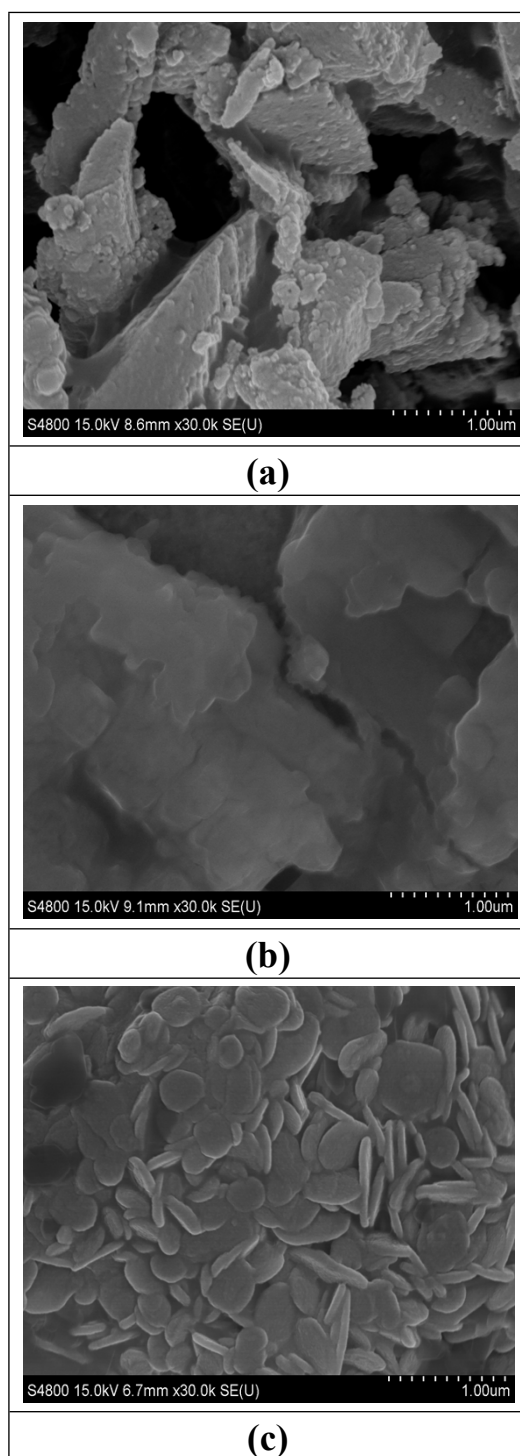

**Fig. S4** SEM micrographs of the raw  $\text{LiNH}_2$  (a), raw  $\text{KNH}_2$  (b) and the just synthesized  $\text{KLi}_3(\text{NH}_2)_4$  by ball milling (c).
